# Supplementary material for: Exceptional preservation of Palaeozoic steroids in a diagenetic continuum
Source: PubMed Central journal article supplement — Sci Rep. 2013 Sep 26;3:2768. doi: 10.1038/srep02768 (PMC3783881; doi:10.1038/srep02768), 2013-09-26
Supplement: srep02768-s1.pdf [file srep02768-s1.pdf]

## Supplementary information

### Exceptional preservation of Palaeozoic steroids in a diagenetic continuum

Ines Melendez<sup>1\*</sup>, Kliti Grice<sup>1\*</sup> and Lorenz Schwark<sup>1,2\*</sup>

<sup>1</sup>WA Organic and Isotope Geochemistry Centre, Department of Chemistry, Curtin University, Perth, Western Australia 6845, Australia

<sup>2</sup>Institute of Geoscience, Christian Albrechts University, 24118 Kiel, Germany

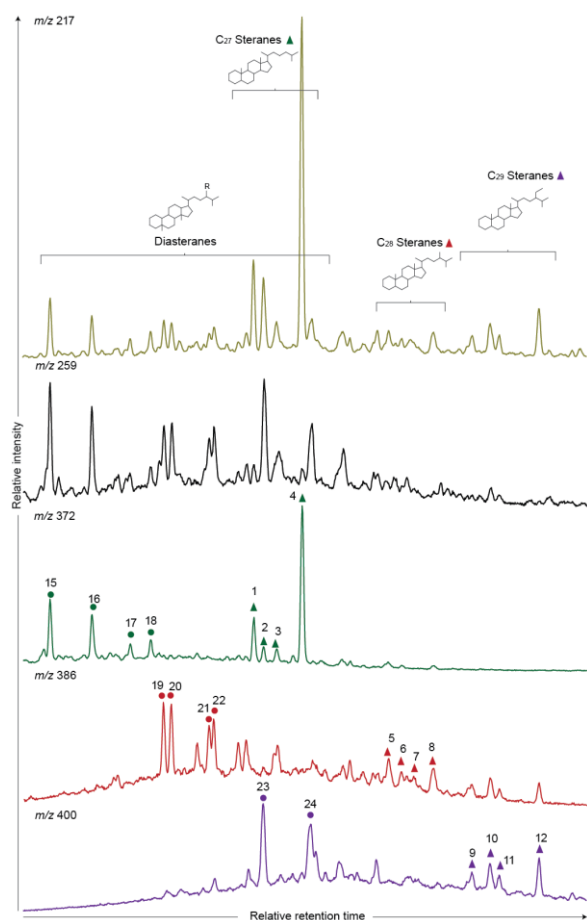

**Fig. S1.** Mass fragmentograms:  $m/z$  217, 259, 372, 386 and 400, showing the distribution of steranes and diasteranes in the saturate fraction of the fossil layer (numbered peaks refer to Table 1). R= H, CH<sub>3</sub>, C<sub>2</sub>H<sub>5</sub>.

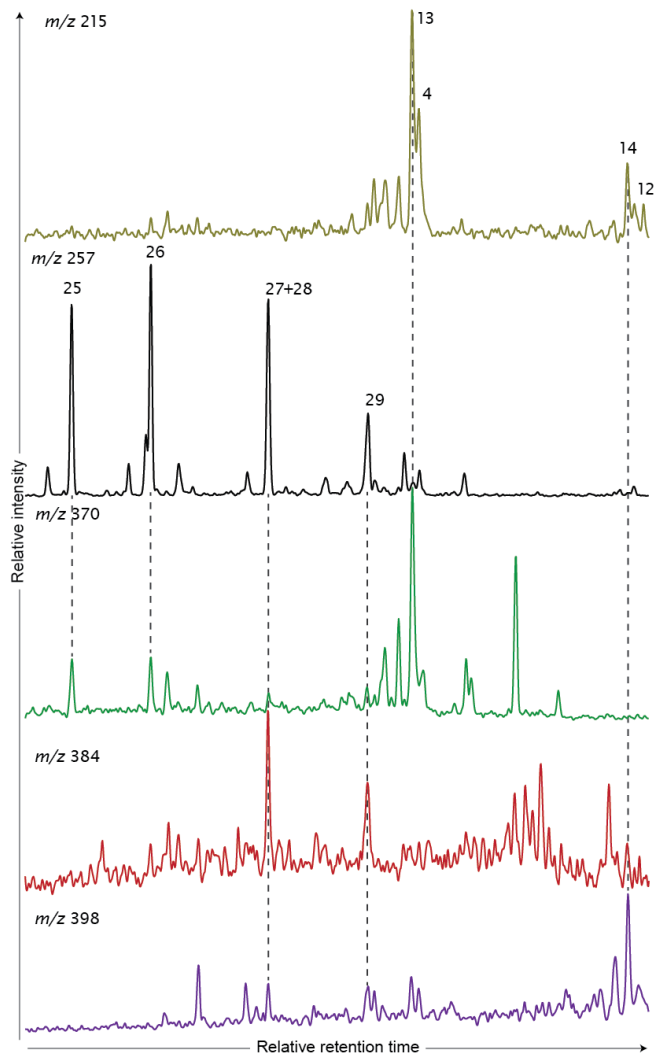

**Fig. S2.** Mass fragmentograms:  $m/z$  215, 257, 370, 384 and 398, showing the distribution of sterenes and diasterenes in the saturate fraction of the fossil layer (numbered peaks refer to Table 1)

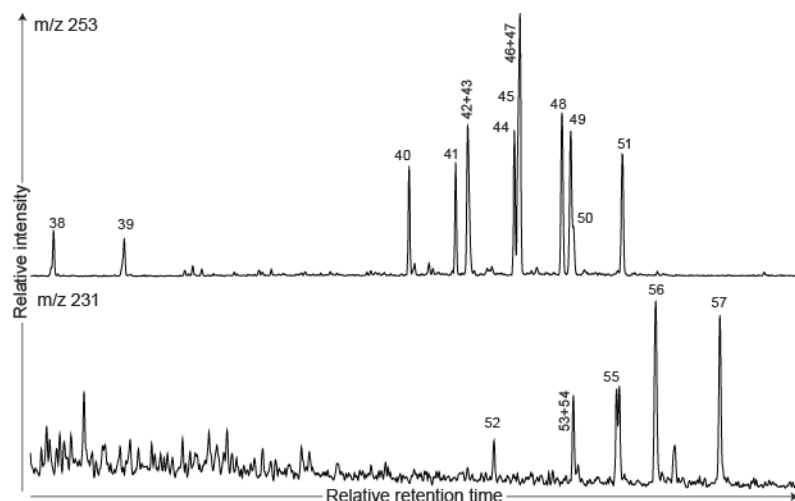

**Fig. S3.** Mass fragmentograms:  $m/z$  253 and 231 of the aromatic fraction from the fossil layer, showing the distribution of mono and tri-aromatics steroids (numbered peaks refer to Table 1).

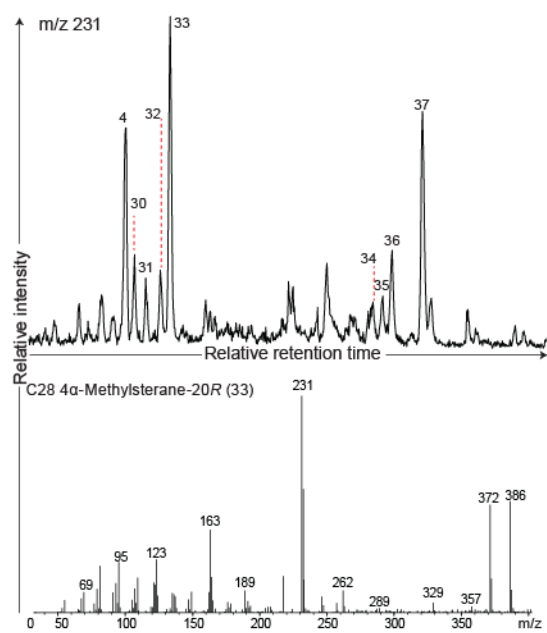

**Fig. S4.** Mass fragmentogram:  $m/z$  231, showing the distribution of  $4\alpha$ -methylsteranes in the saturate fraction of the fossil layer (numbered peaks refer to Table S1) and mass spectrum of the  $C_{28}$   $4\alpha$ -methylsterane- $20R$  (33) confirming its identification.

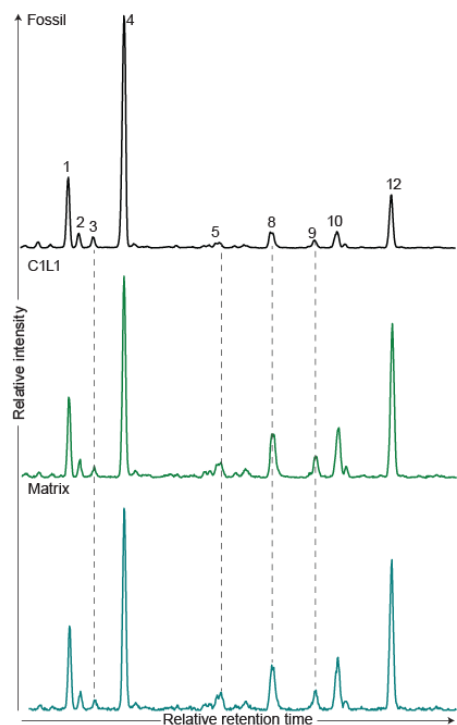

**Fig. S5.** Mass fragmentogram:  $m/z$  217 of the fossil layer and subsequent matrix layers showing the variation in the distribution of steranes across the concretion (numbered peaks refer to Table 1).

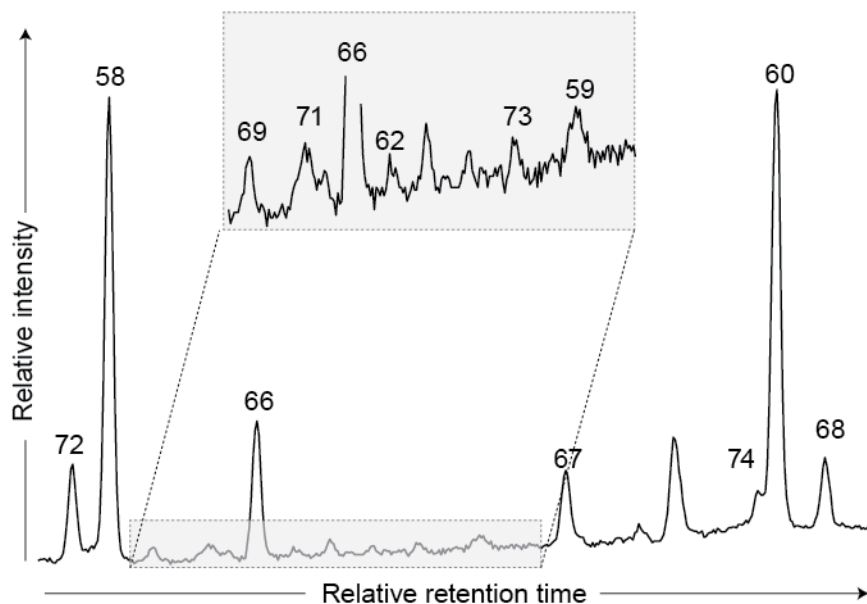

**Fig S6.** Partial total ion chromatogram of the derivatized alcohol fraction in fossil (numbered peaks refer to Table 1).

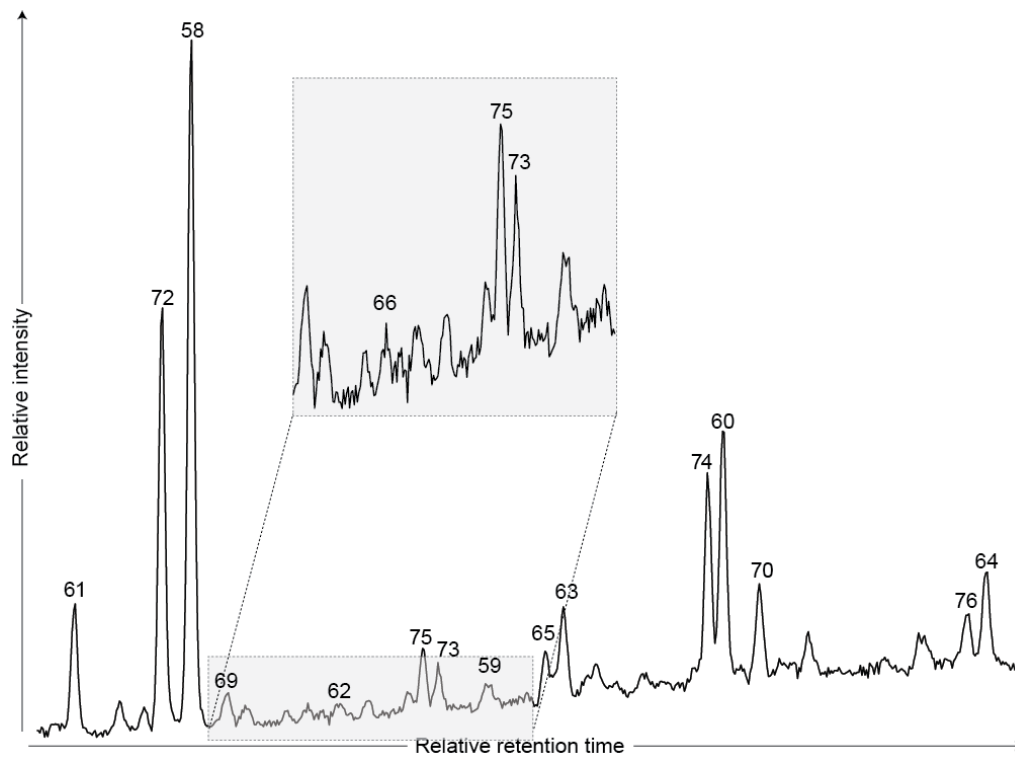

**Fig S7.** Partial total ion chromatogram of the derivatized alcohol fraction from the matrix-L1, located underneath the fossil (numbered peaks refer to Table S1).

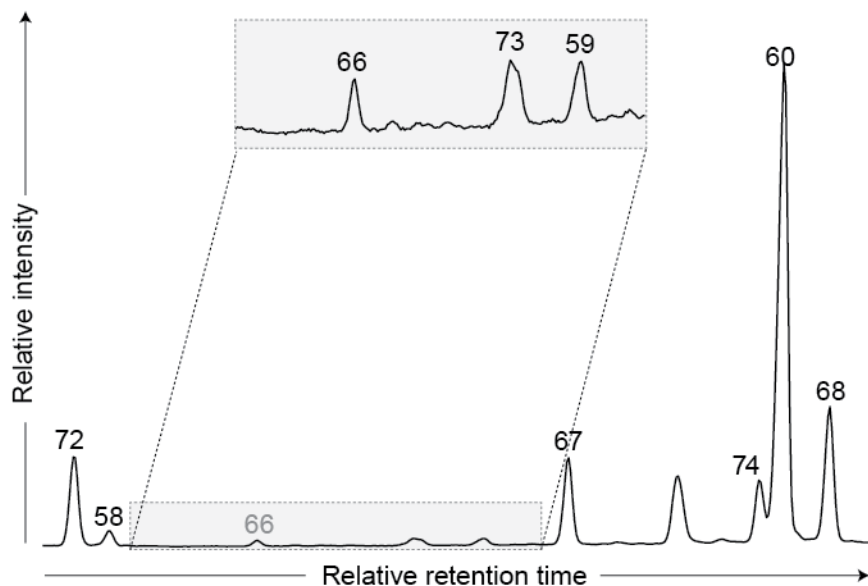

**Fig S8.** Partial total ion chromatogram of the derivatized alcohol fraction from the matrix (numbered peaks refer to Table 1).
